# Supplementary figures and images for: A kinetic and thermodynamic framework for the Azoarcus group I ribozyme reaction
Source: PubMed Central journal article supplement — RNA. 2014 Nov;20(11):1732–46. doi: 10.1261/rna.044362.114 (PMC4201826; doi:10.1261/rna.044362.114), 2014-11

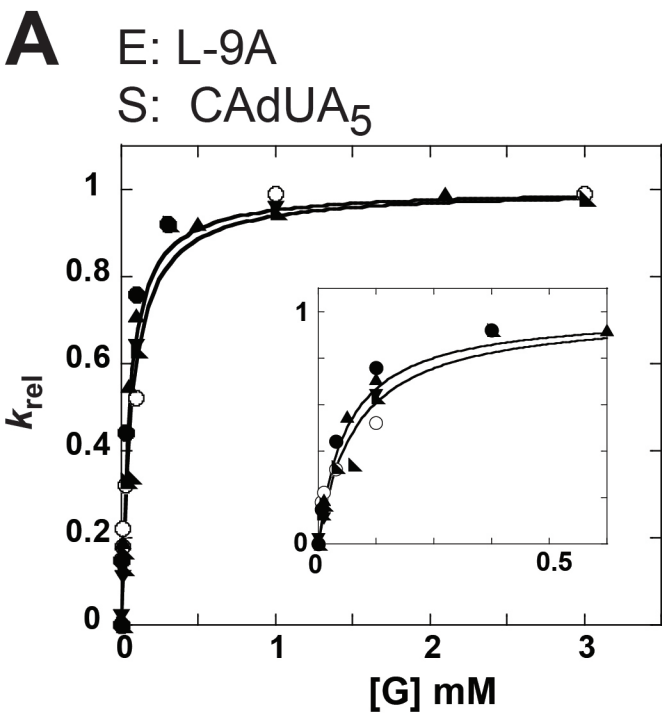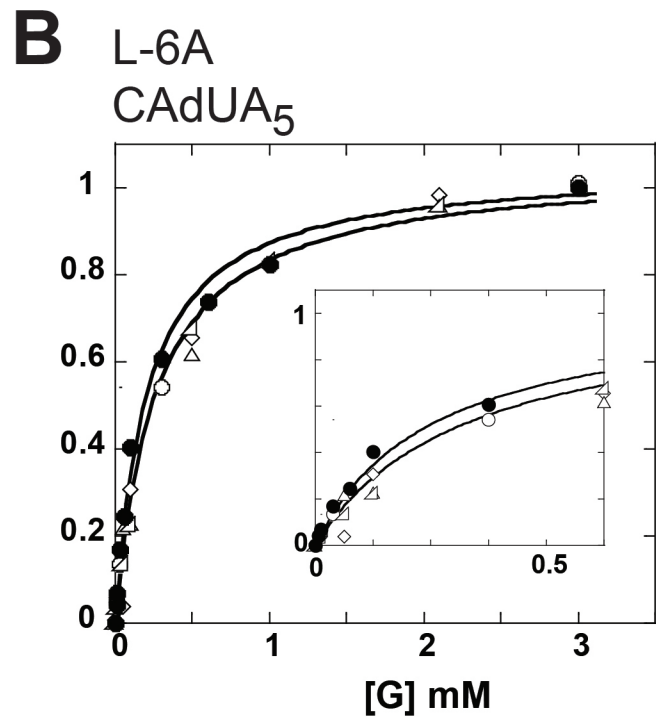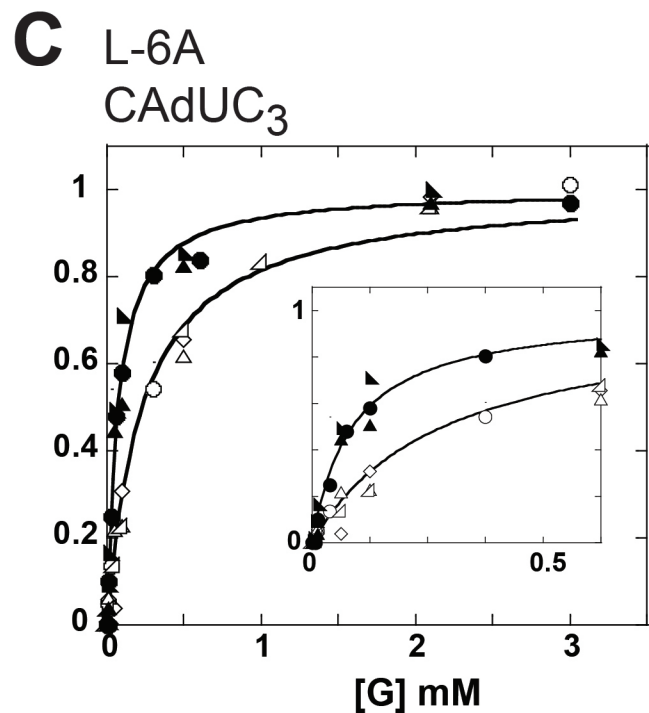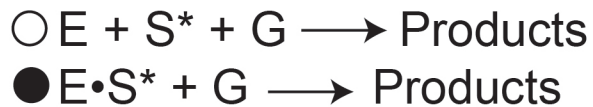

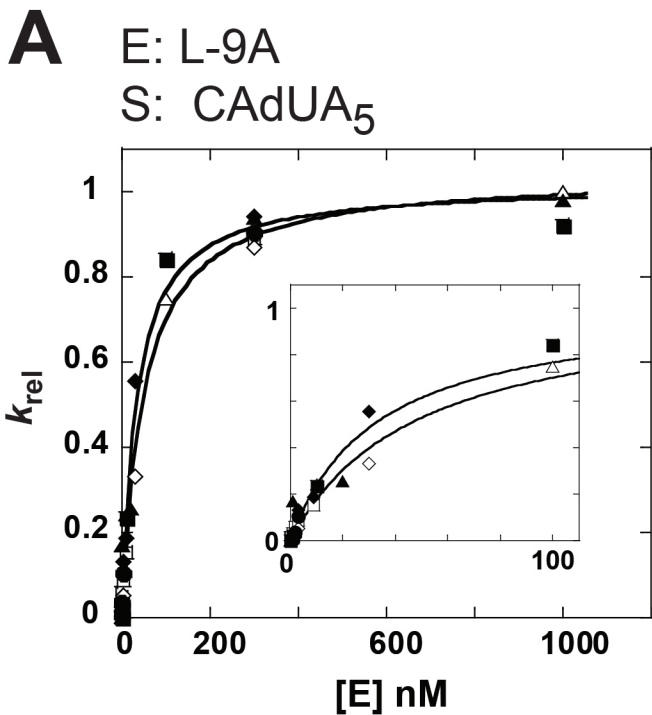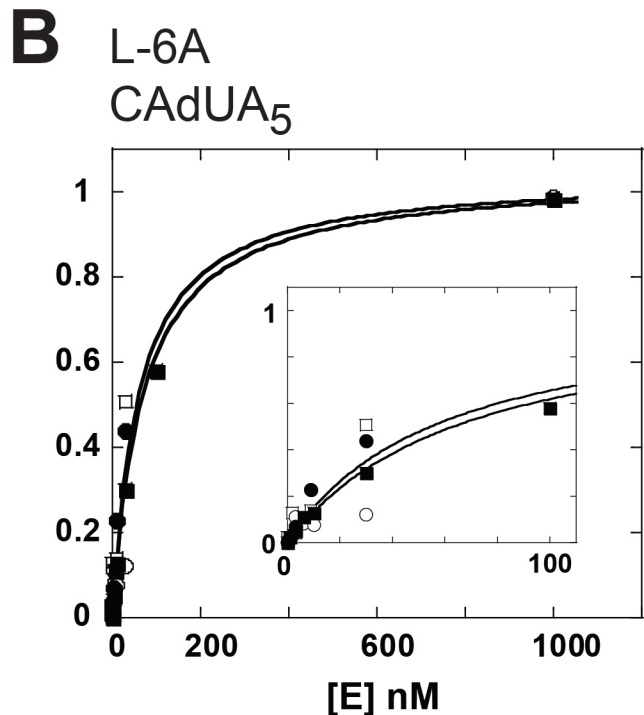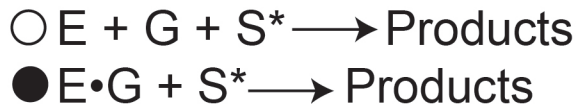

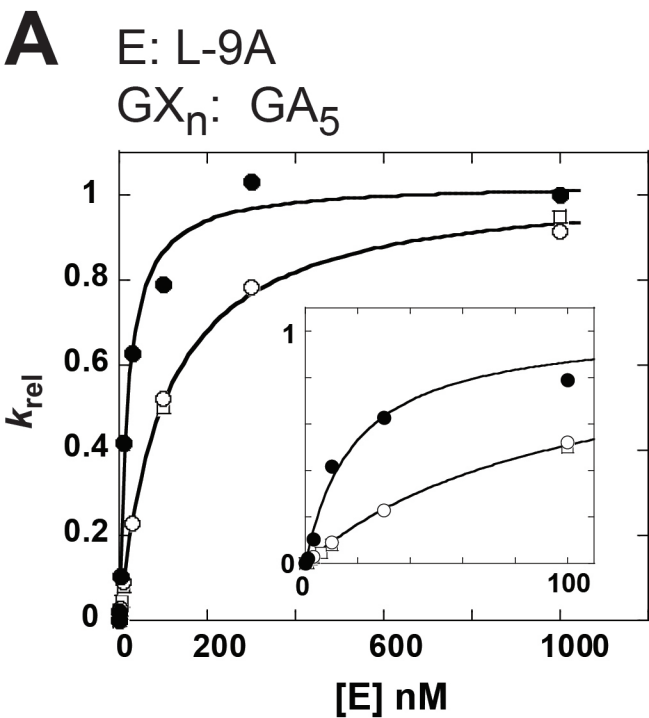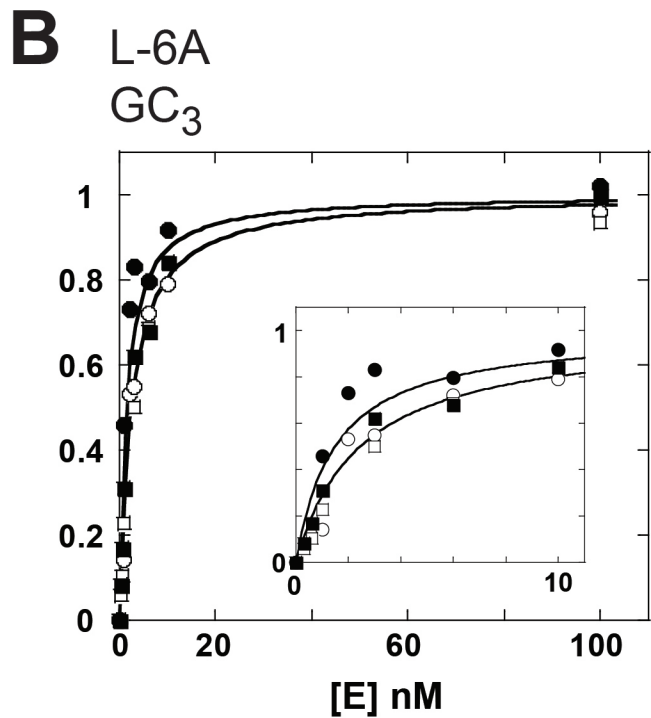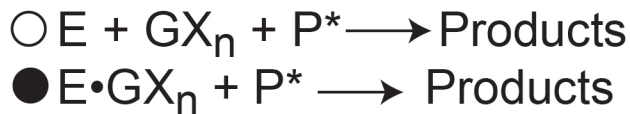

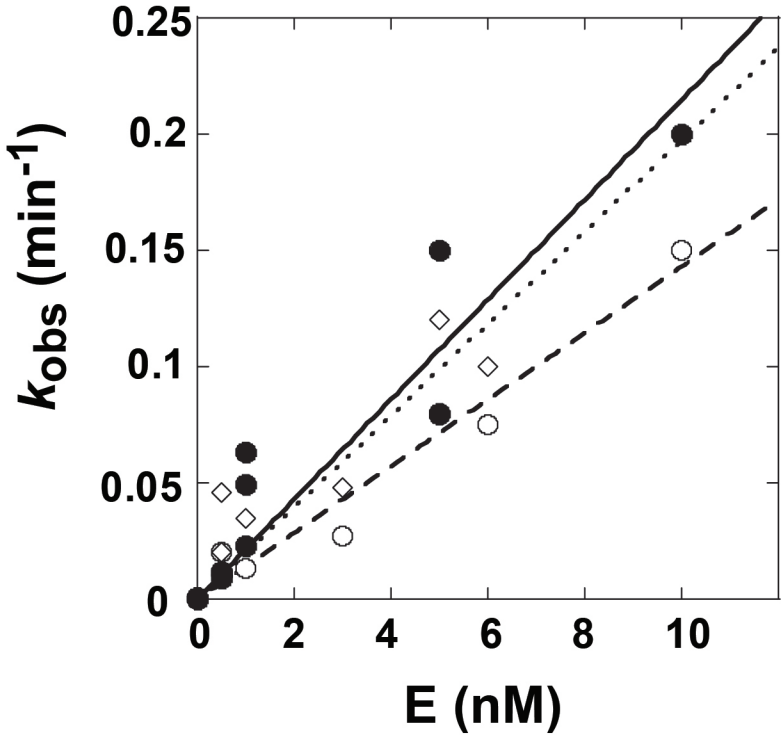

**A**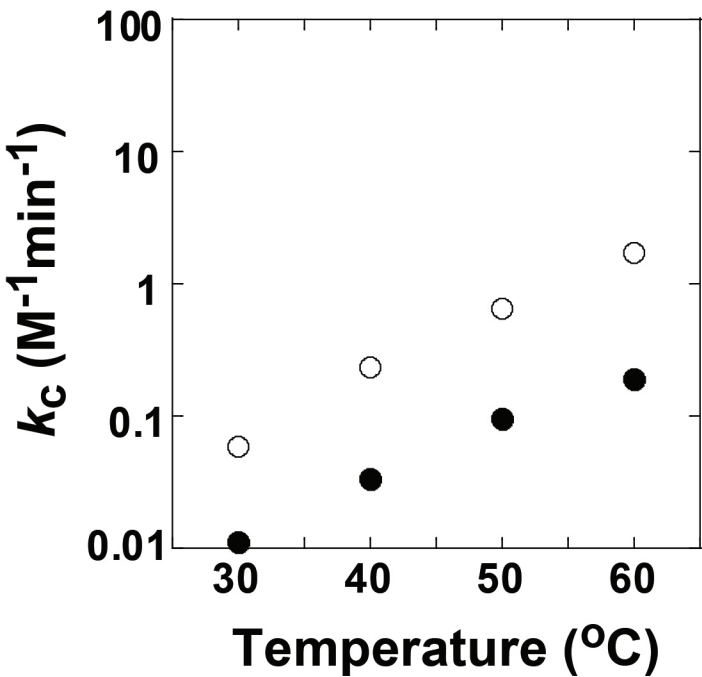**B**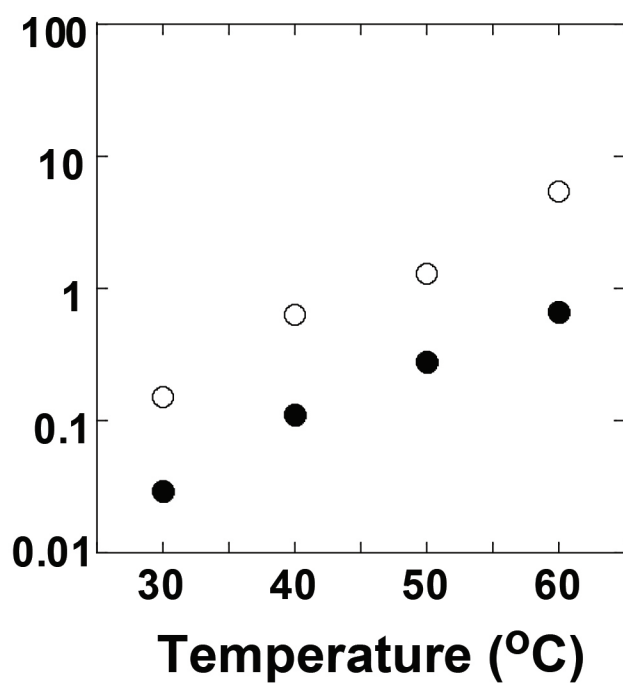**C**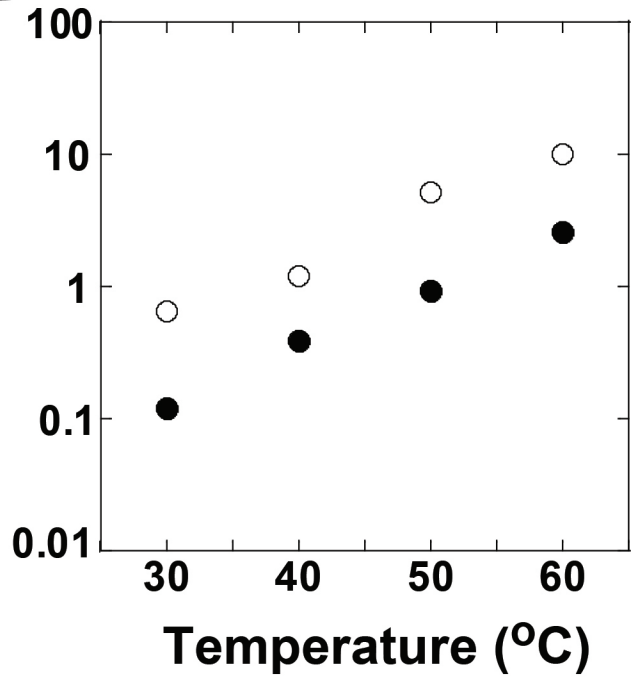

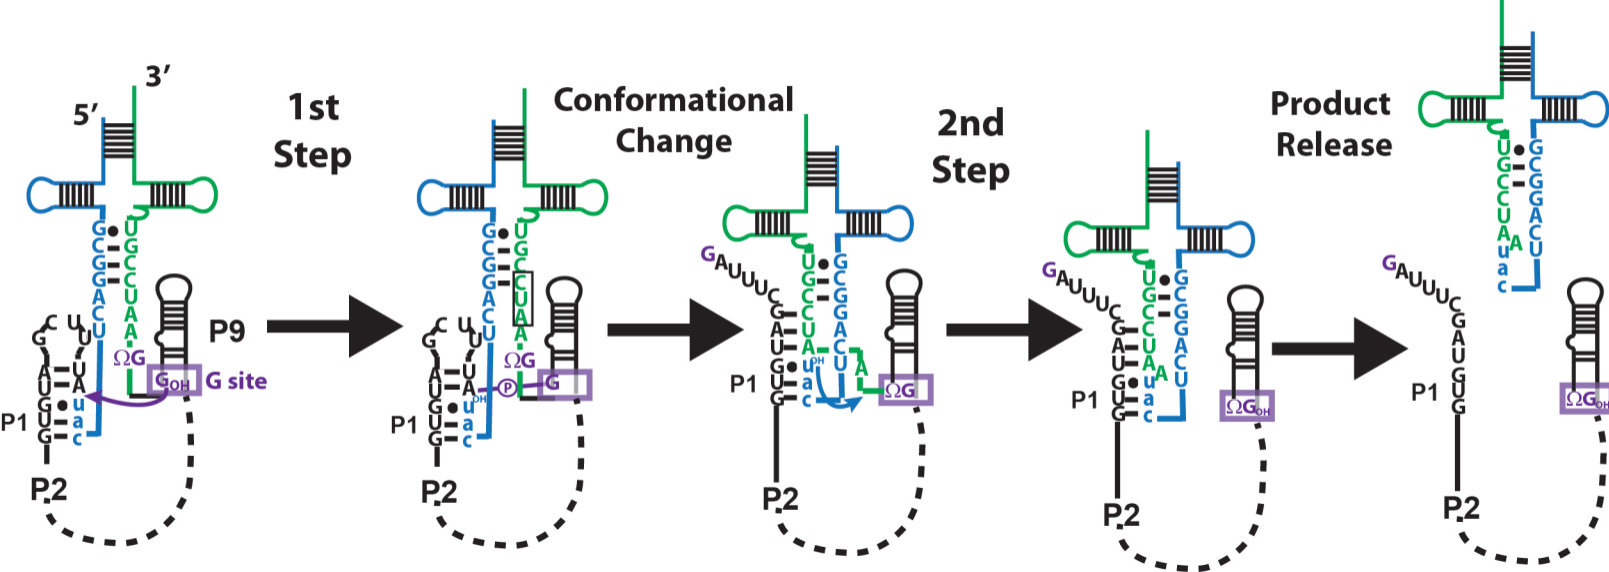

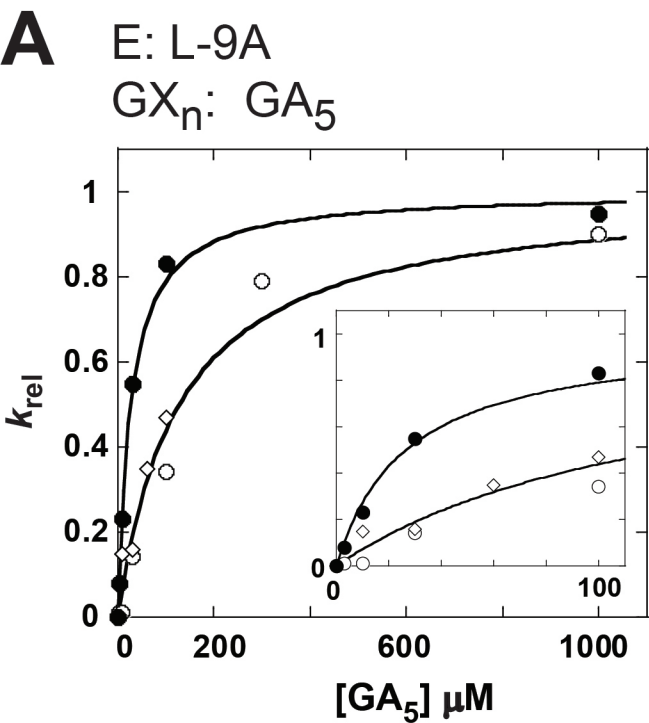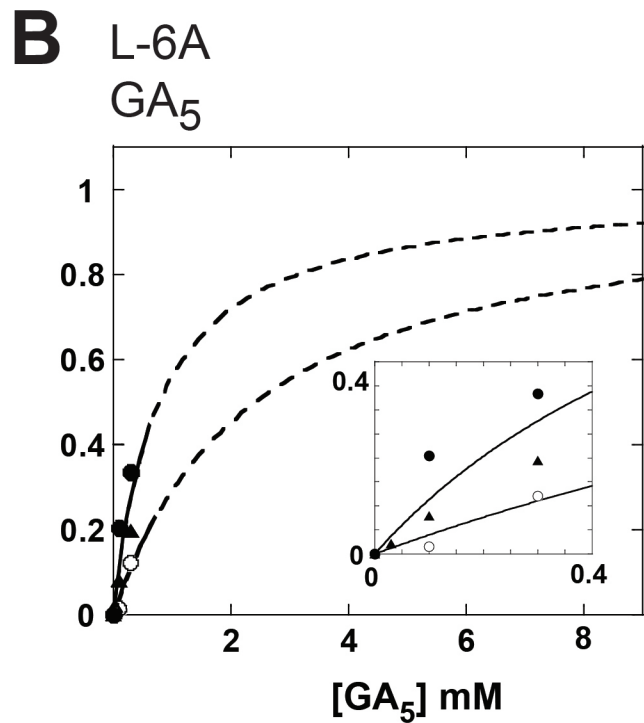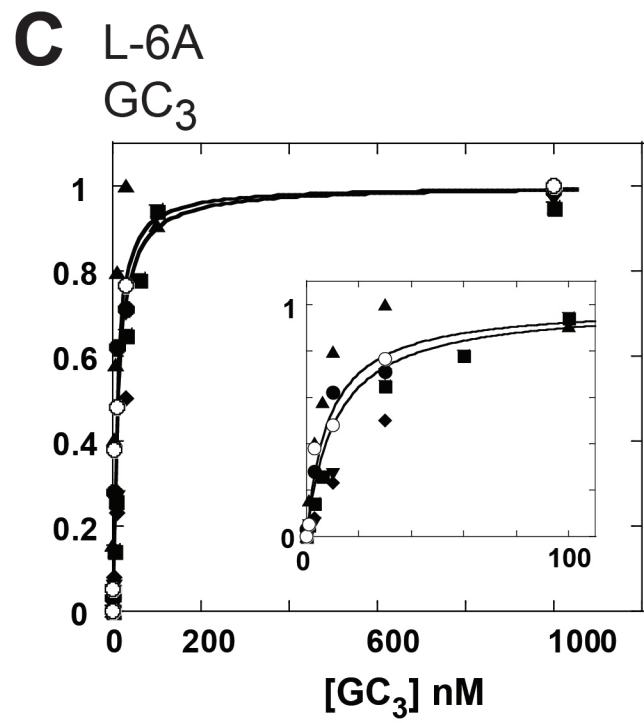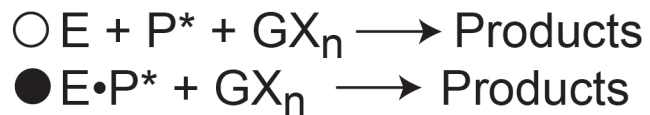

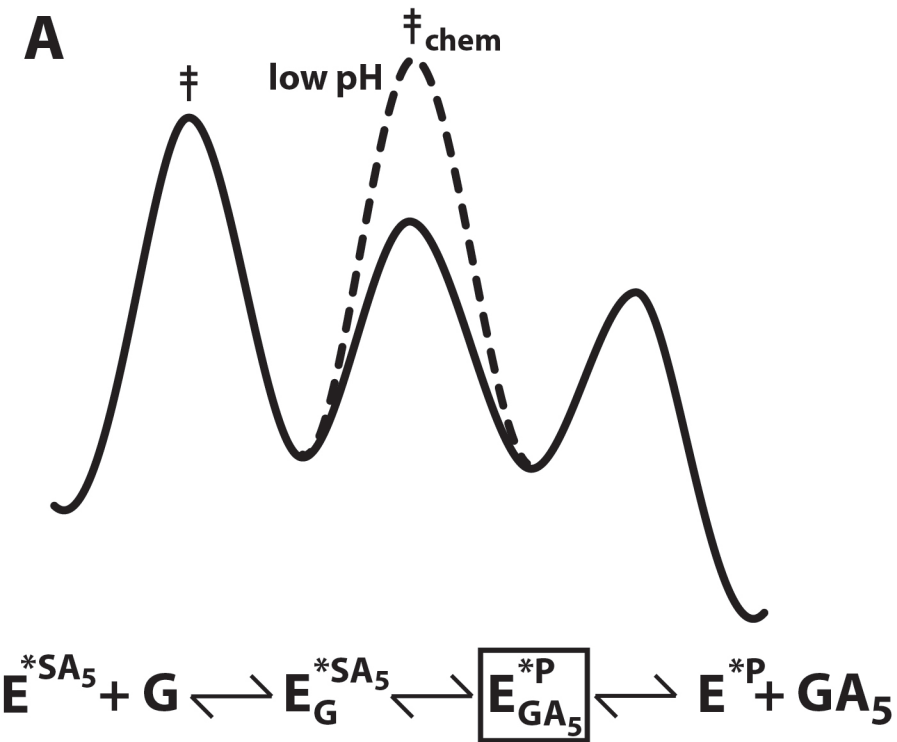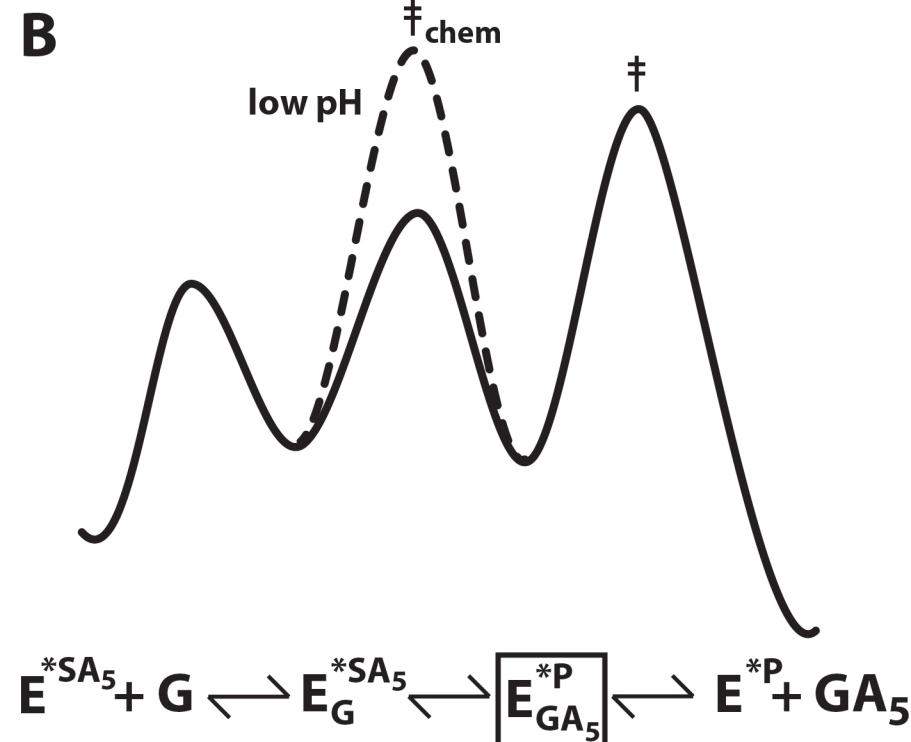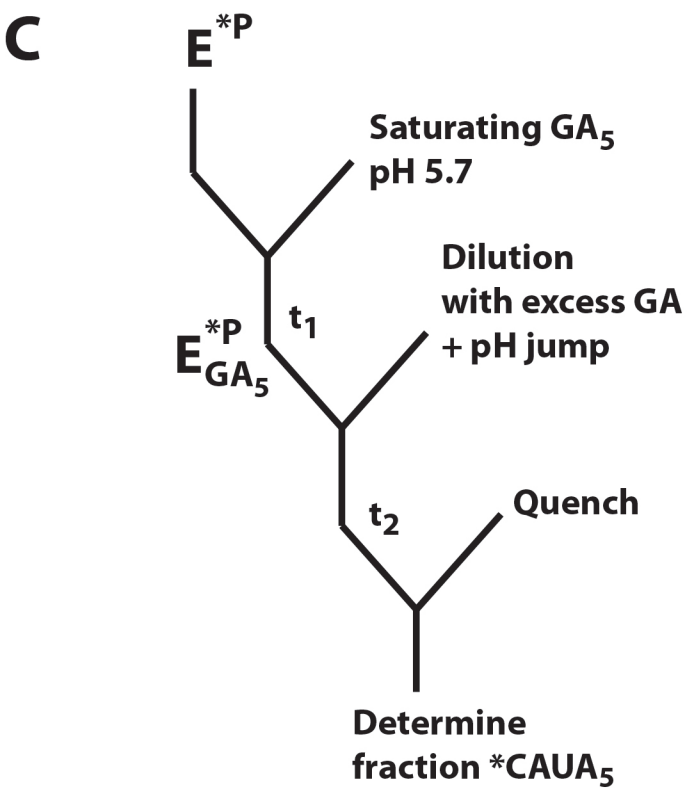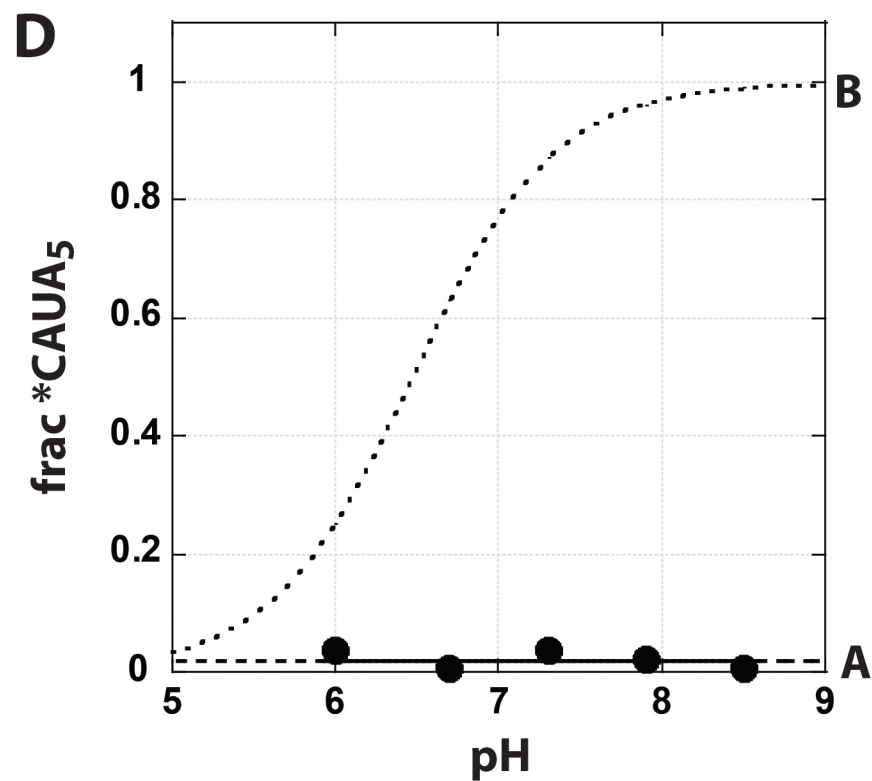



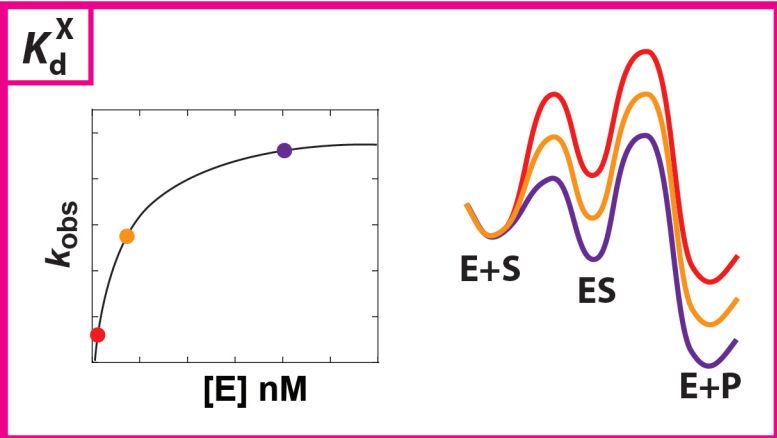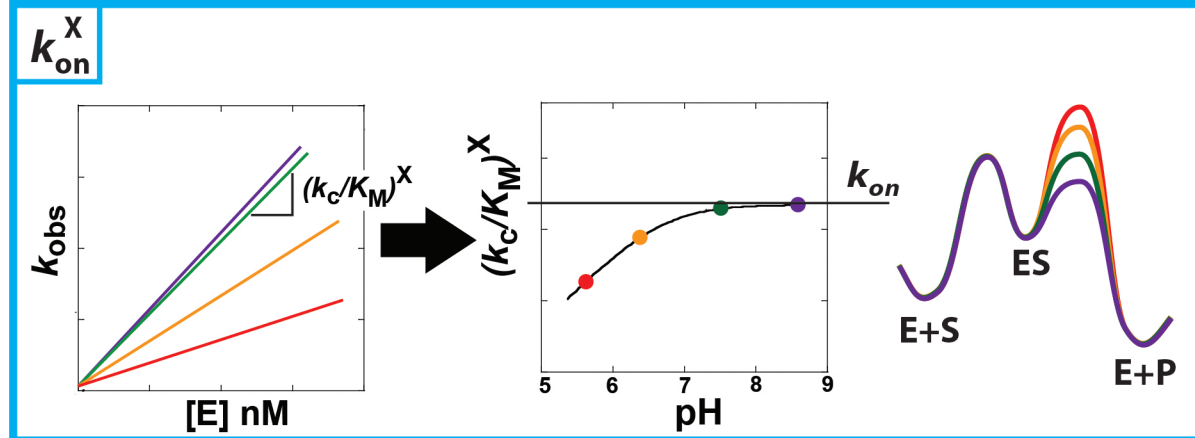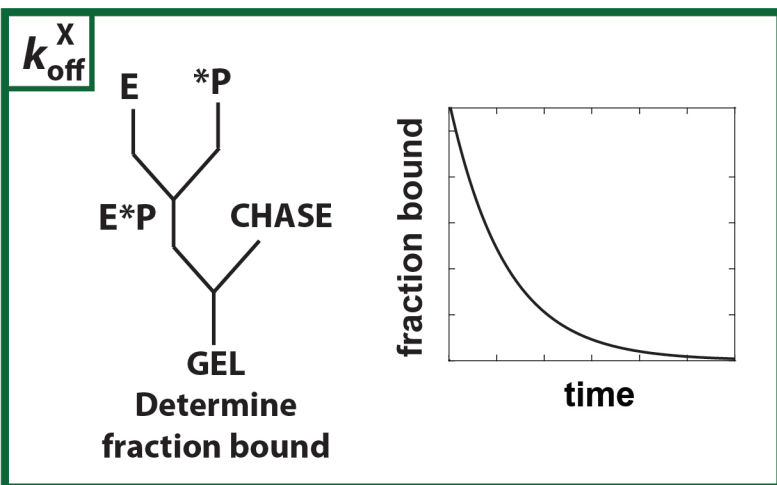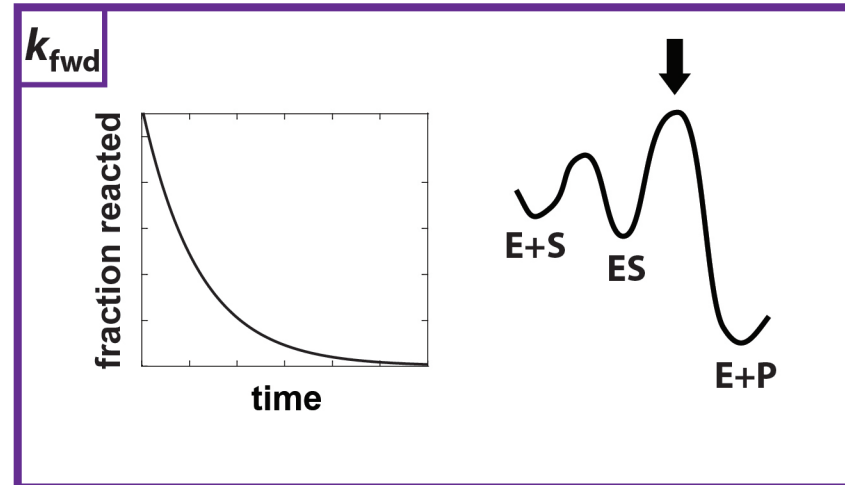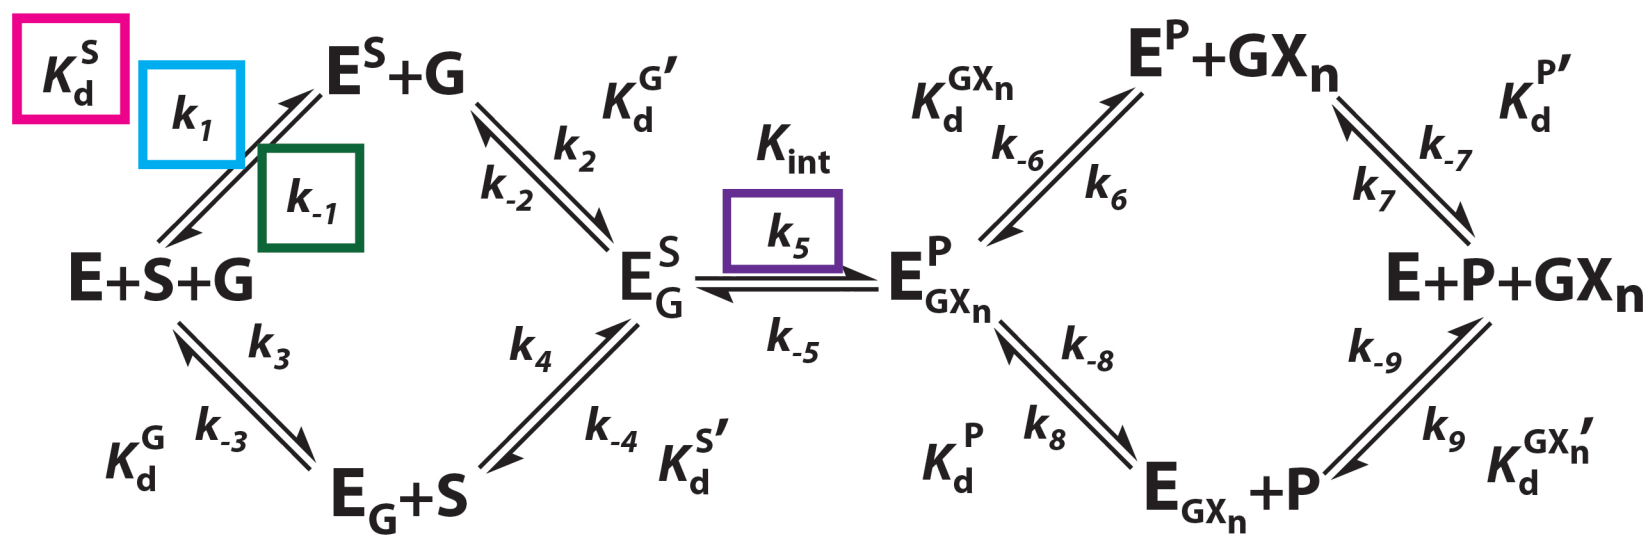

Supplement: supp_044362.114_SuppFigures.pdf [file supp_044362.114_SuppFigures.pdf]
